# Supplementary material
Source: PubMed Central journal article supplement (PMC4485521)
Supplement: NIHMS688137-supplement-1.pdf [file NIHMS688137-supplement-1.pdf]

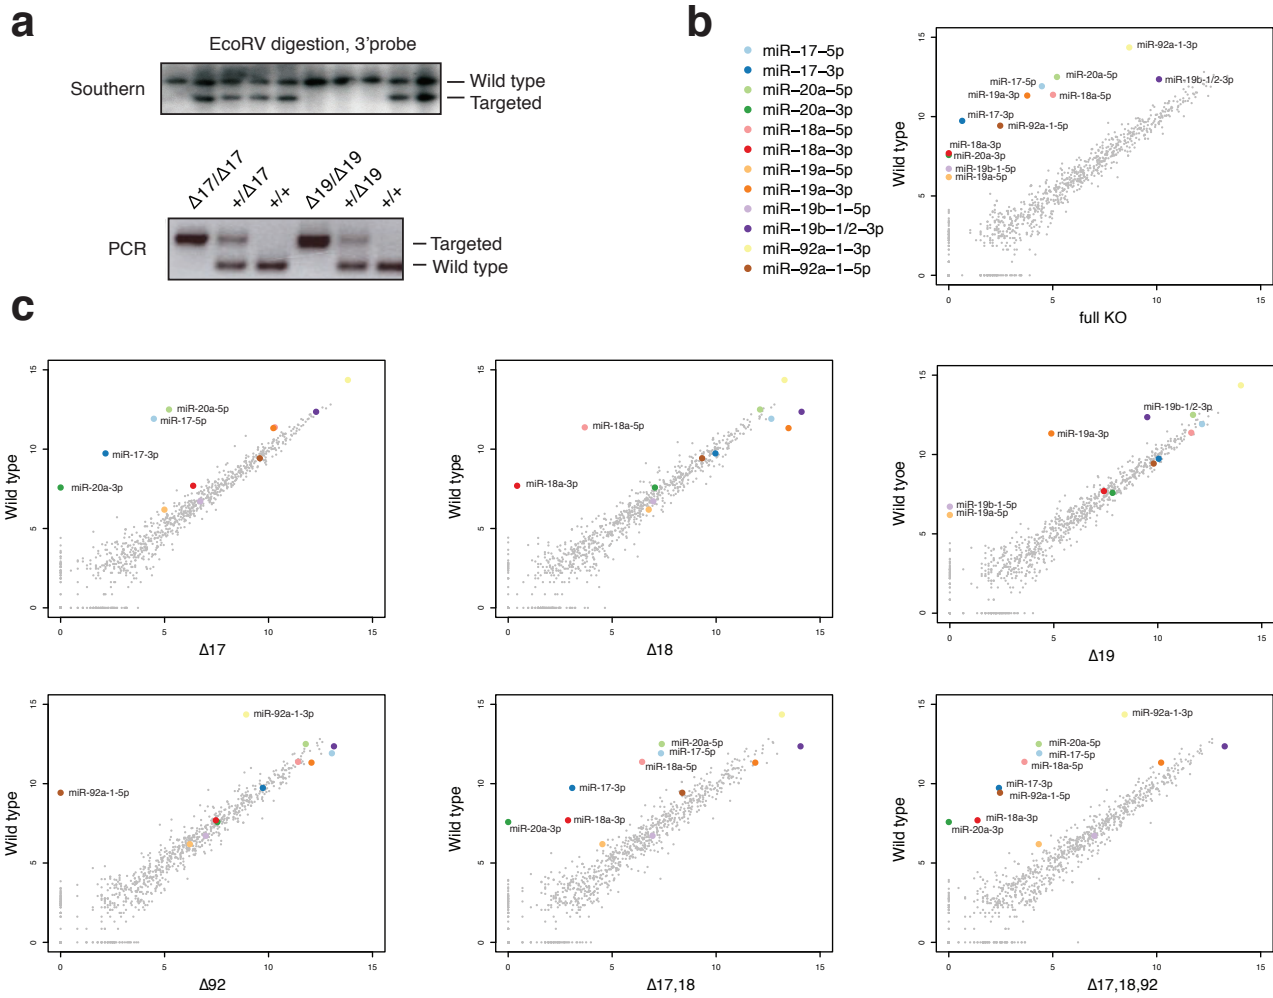

Supplementary Figure 1

**Generation and validation of mice carrying a series of *miR-17~92* alleles**

(a) *Top*, southern blot to EcoRV-digested genomic DNA extracted from neomycin-selected ES clones targeted with the *miR-17~92*<sup>Δ17</sup> construct; *Bottom*, genotyping PCR showing germline transmission of two *miR-17~92* mutant alleles. (b,c) Scatter plots showing miRNA expression as determined by small RNA-seq in *miR-17~92*-null (b) or *miR-17~92* allelic series' embryos (c) versus a wild type control. Both strands of the miRNAs encoded by the *miR-17~92* cluster are highlighted in color. Expression values are represented as log of normalized counts.

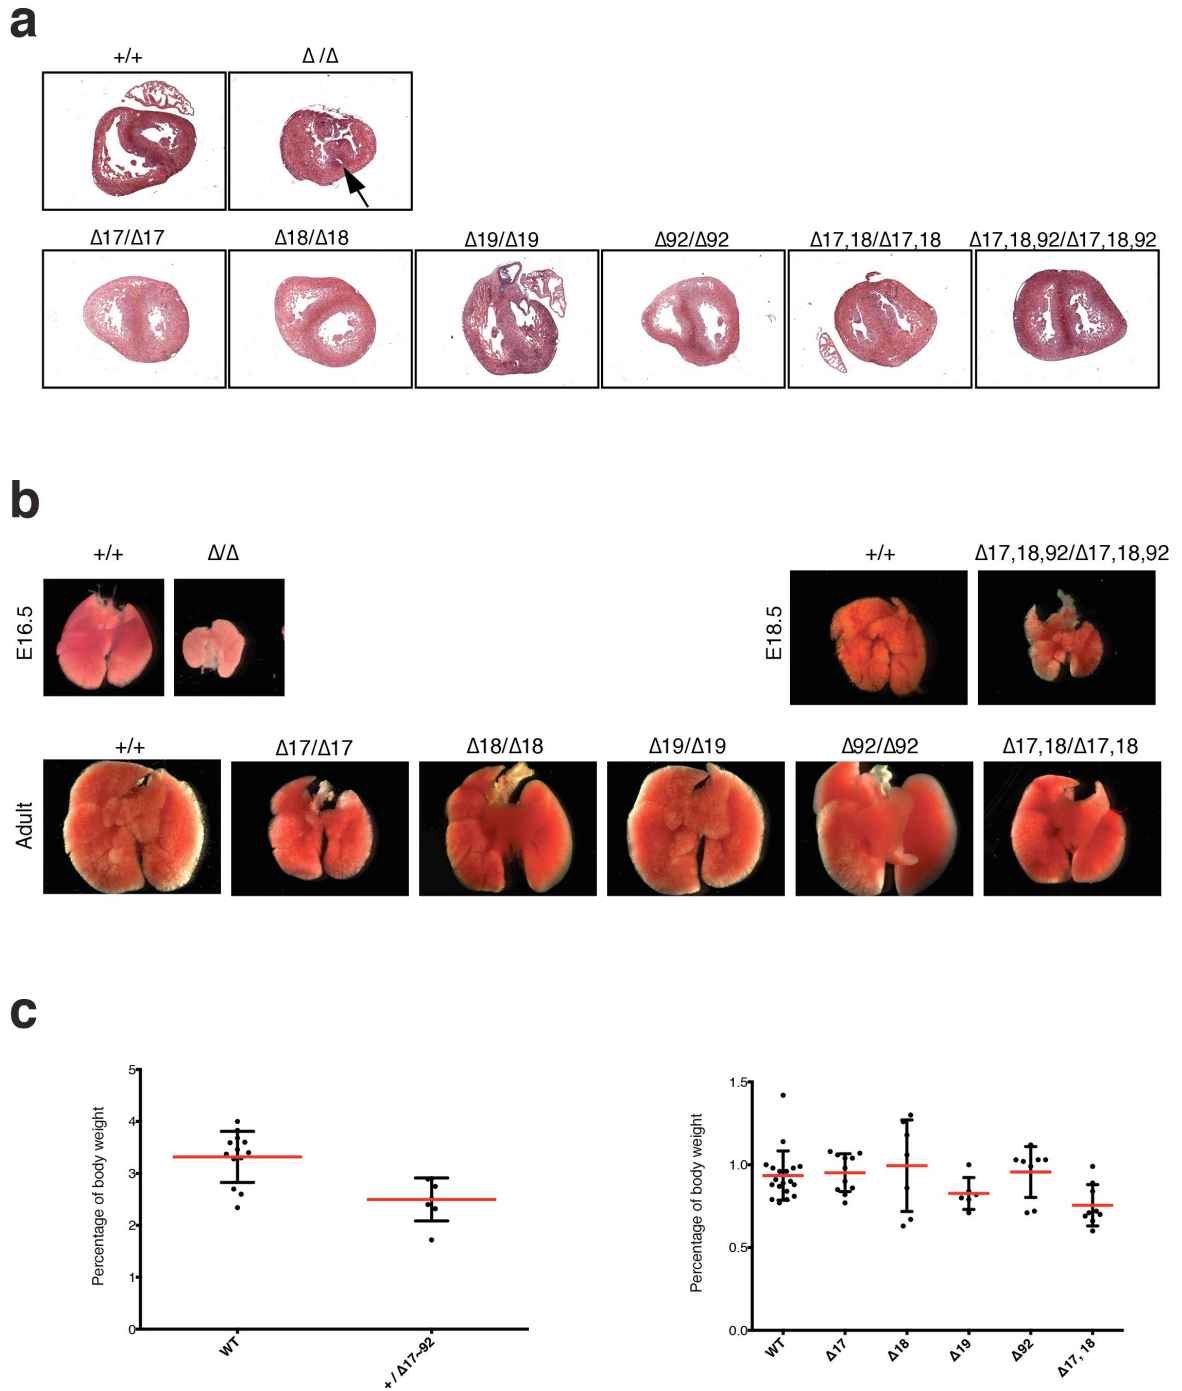

Supplementary Figure 2

**Heart and lung development in miR-17~92 mutant mice**

(a) Hematoxylin-eosin stainings of transverse sections of hearts from E18.5 wild type (+/+) *miR-17~92*-null ( $\Delta/\Delta$ ) and homozygous embryos from the *miR-17~92* the allelic series. Black arrow indicates a ventricular septal defect (n > 3). (b) Macroscopic view of representative lungs from *miR-17~92* mutant animals and wild-type controls. (c) Weight of lungs as percentage of total body weight. Red bar represents average. Error bars represent s.d.

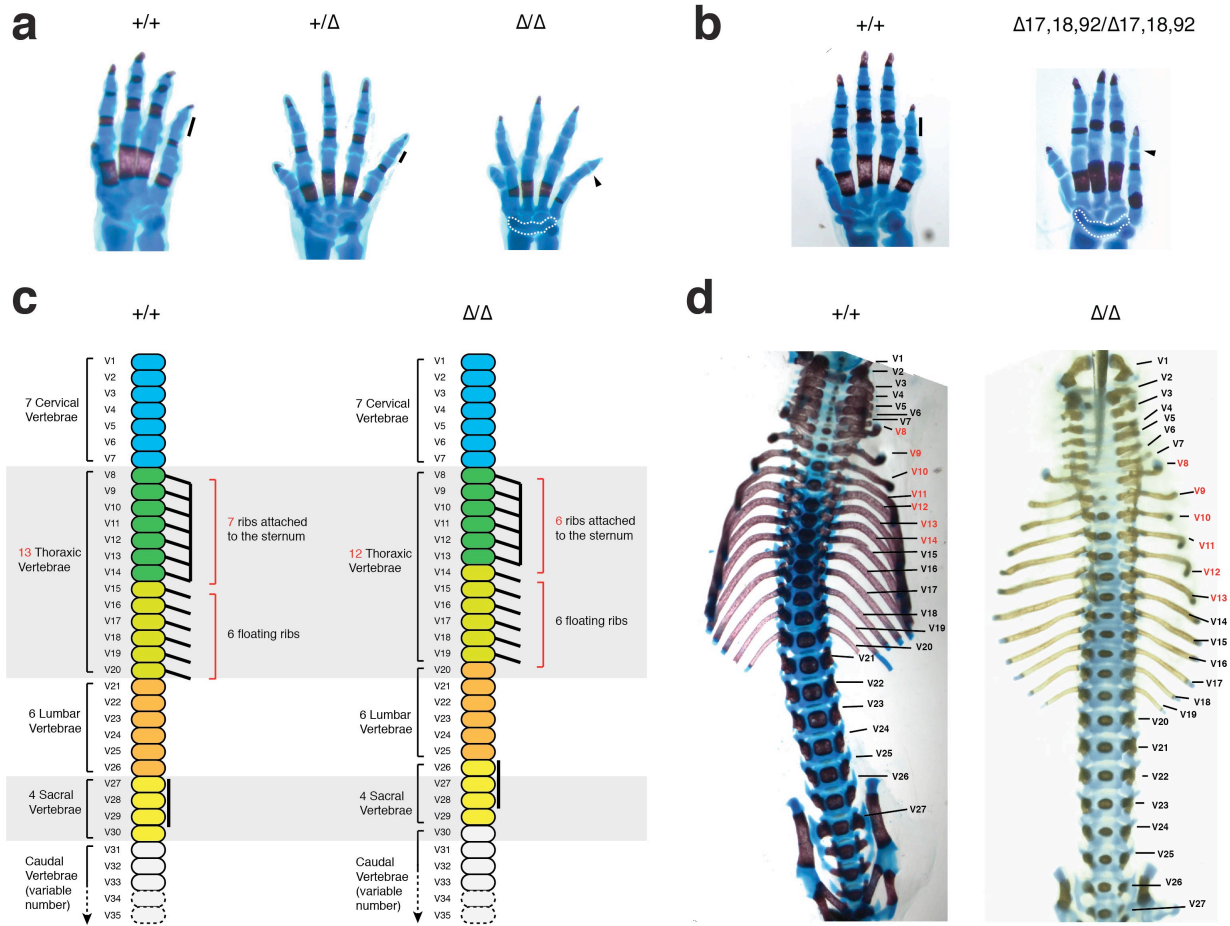

Supplementary Figure 3

**Skeletal defects in *miR-179~2* mutant mice**

(a,b) Alcian blue/alizarin red stainings of forelimb autopods of *miR-17~92*<sup>+/+</sup>, *miR-17~92*<sup>+/-</sup> and *miR-17~92*<sup>Δ/Δ</sup> (a) or *miR-17~92*<sup>+/+</sup> and *miR-17~92*<sup>Δ17,18,92/Δ17,18,92</sup> E18.5 embryos (b). Black bar represents length of mesophalanx. Arrowhead indicates absence of phalanx. Fusion of carpal bones is indicated by dotted line. (c) Schematic representation of vertebral patterning in wild type and *miR-17~92*<sup>Δ/Δ</sup> animals. (d) Ventral view of the skeletons shown in Fig.3. The position of vertebrae V1 to V27 is indicated. Vertebrae whose ribs attach to the sternum are indicated in red.

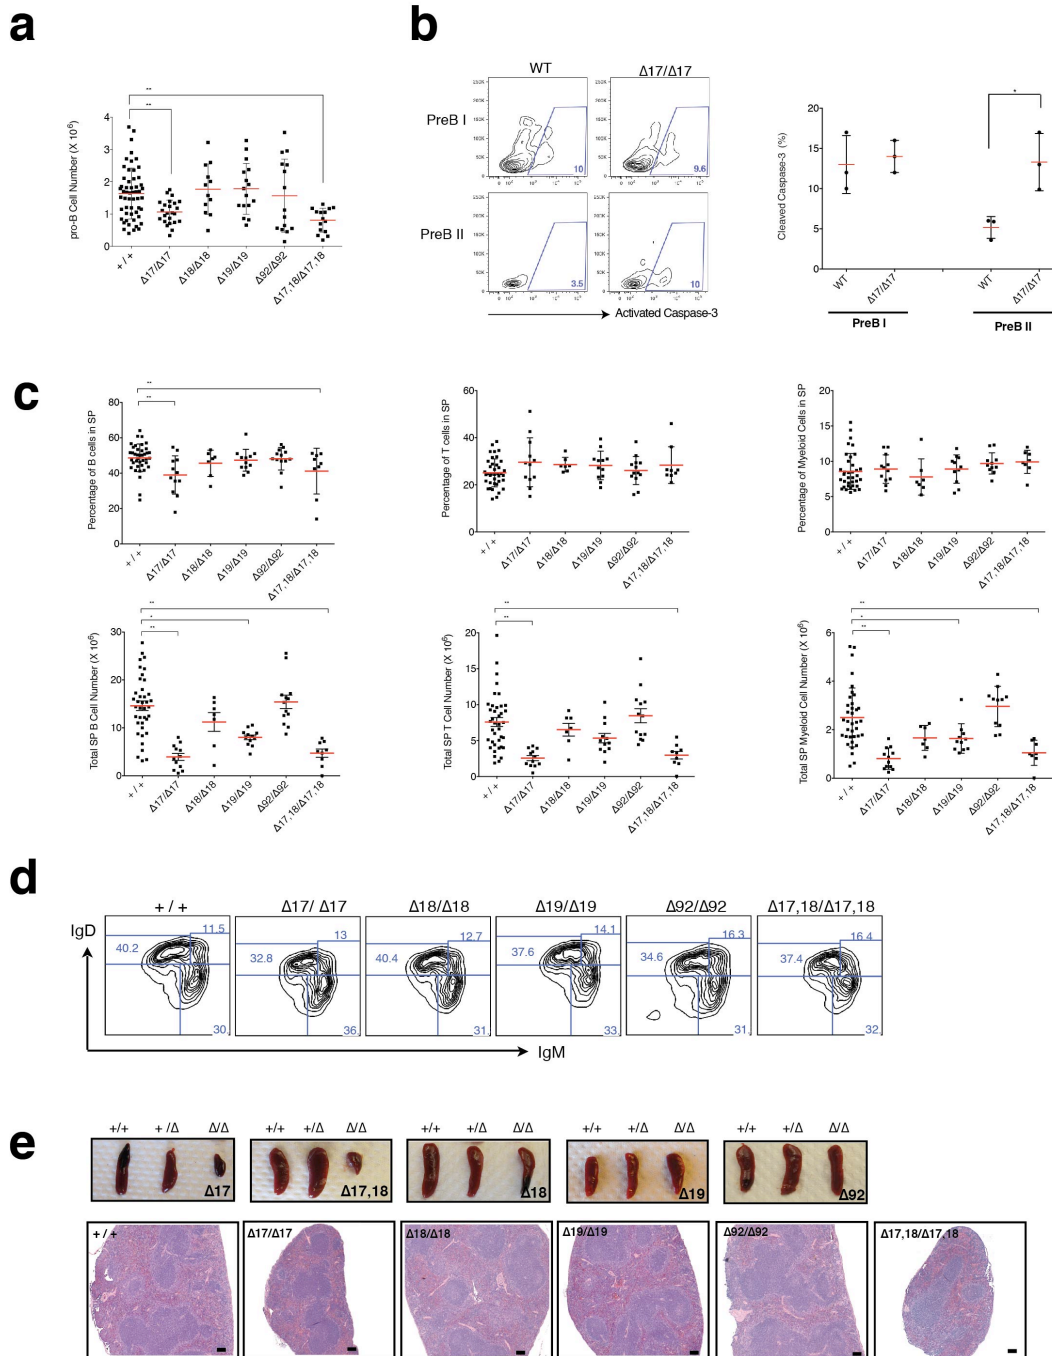

Supplementary Figure 4

**Peripheral Immune system in mice of the miR-17~92 allelic series**

**(a)** Absolute pro-B cell number **(b) Left**, representative flow cytometry plots showing the percentage of cleaved caspase-3 positive Pre-BI and Pre-BII cells from 5–7 week-old mice. Results from independent experiments are presented in the *right panel*. **(c)** Relative (*top*) and absolute number (*bottom*) of splenic B cells (B220+), T cells (TCRb+) and myeloid cells (CD11b+) from viable homozygous mutant animals. **(d)** Representative flow cytometry plots of splenic B cells (gated for B220+) showing that the maturation of B cells in all viable mutant mice is comparable to that in wild type controls. **(e) Top**, spleens from adult animals. *Bottom*, Hematoxylin and eosin staining of spleen sections from viable homozygous mutant mice at the age of 5–6 weeks showing an intact overall structure of the spleens. Black bar represents 100  $\mu\text{m}$ . Horizontal red bars indicate the median value for each strain ( $n > 8$ ). \*  $p < 0.05$ , \*\*  $p < 0.001$  (2-tailed t-test).

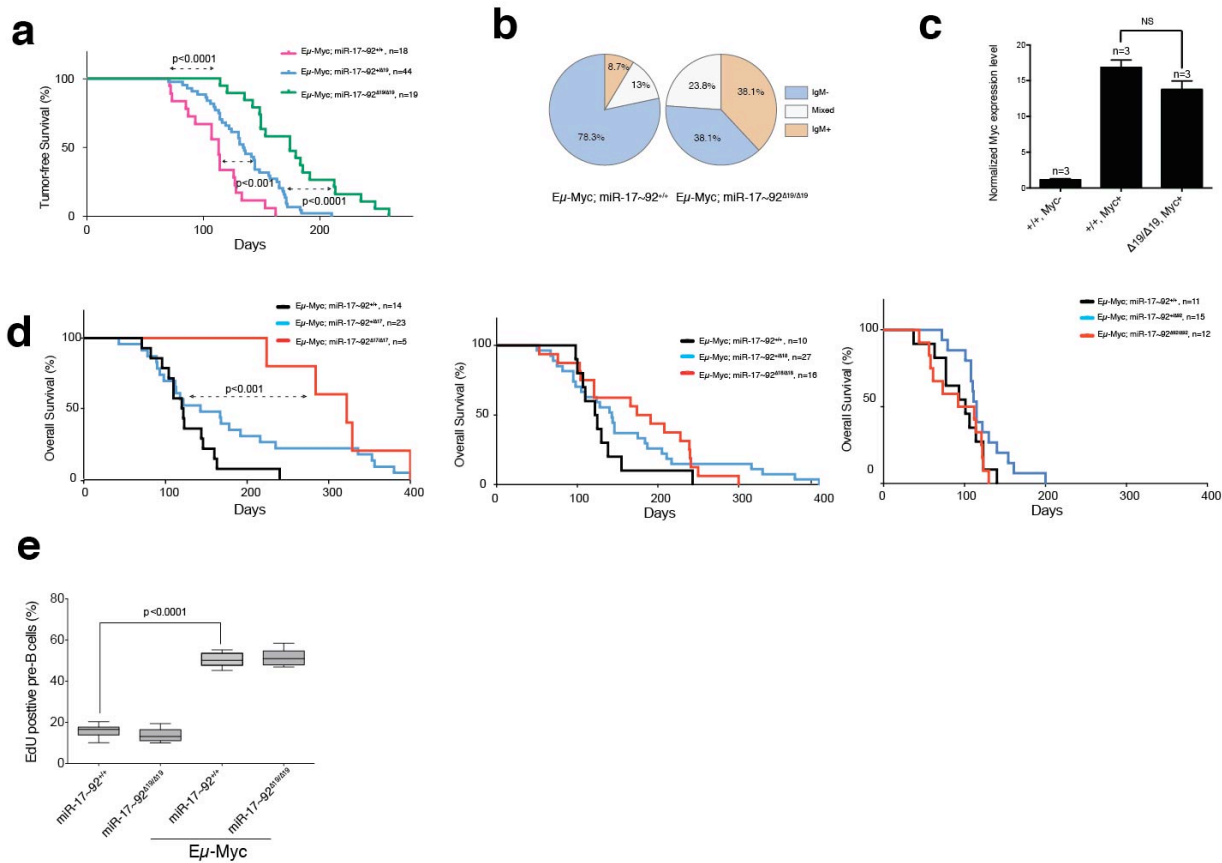

Supplementary Figure 5

**Myc-driven lymphomagenesis in mice from the miR-17~92 allelic series**

(a) Tumor free survival curve of *miR-19* deficient mice. (b) Immunophenotype of B cell lymphomas (gated for B220+) developing in the spleen of  $E\mu$ -Myc;miR-17~92<sup>+/+</sup> and  $E\mu$ -Myc;miR-17~92<sup>Δ19/Δ19</sup> mice. "Mixed" indicates tumors in which the fraction of IgM+ cells was between 30% and 70%. (n > 20 per genotype, p < 0.0001;  $\chi^2$  test). (c) Relative Myc expression in pre-B cells from wild type,  $E\mu$ -Myc;miR-17~92<sup>+/+</sup>, and  $E\mu$ -Myc;miR-17~92<sup>Δ19/Δ19</sup> animals. (d) Survival curve of miR-17, -18 and -92 deficient  $E\mu$ -Myc mice. p-values, Mantel-Cox test. (e) Quantification of the percentage of EdU positive pre-B cells in 5 week-old mice. (p-values, two-tailed t-test).

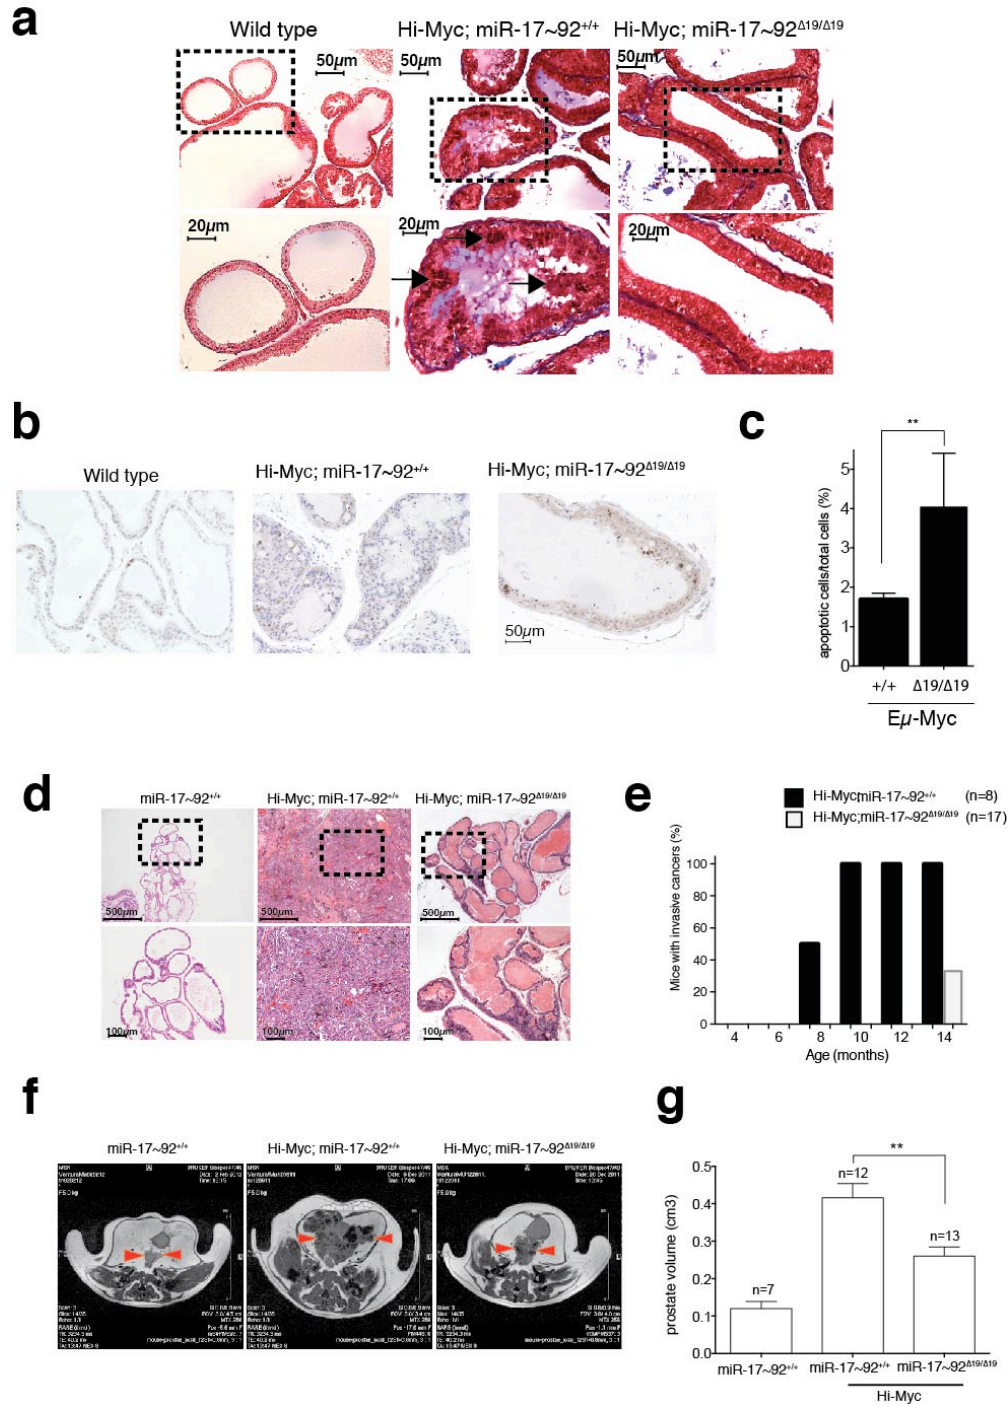

Supplementary Figure 6

**Hi-Myc driven prostate cancer in miR-19-deficient mice**

(a) Masson's trichrome staining on prostate sections from 8 week-old mice. Arrows indicate foci of PINs. (b) Cleaved caspase-3 immunostaining on prostate sections from 8 week-old mice. (c) Bar plot showing the fraction of cleaved caspase-3 cells in Eμ-Myc prostates (miR-17~92<sup>+/+</sup> and miR-17~92<sup>Δ19/Δ19</sup>). (d) H&E staining on prostate sections from 12 month-old mice. (e) Percentage of animals that developed invasive prostate adenocarcinomas up to 14 months of age. (f) MRIs showing transverse sections of the pelvic region of 12 month-old mice of the indicated genotypes. Prostates are indicated by red arrows. (g) Quantification of prostate volume (2-tailed t-test. Error bars = s.d.).

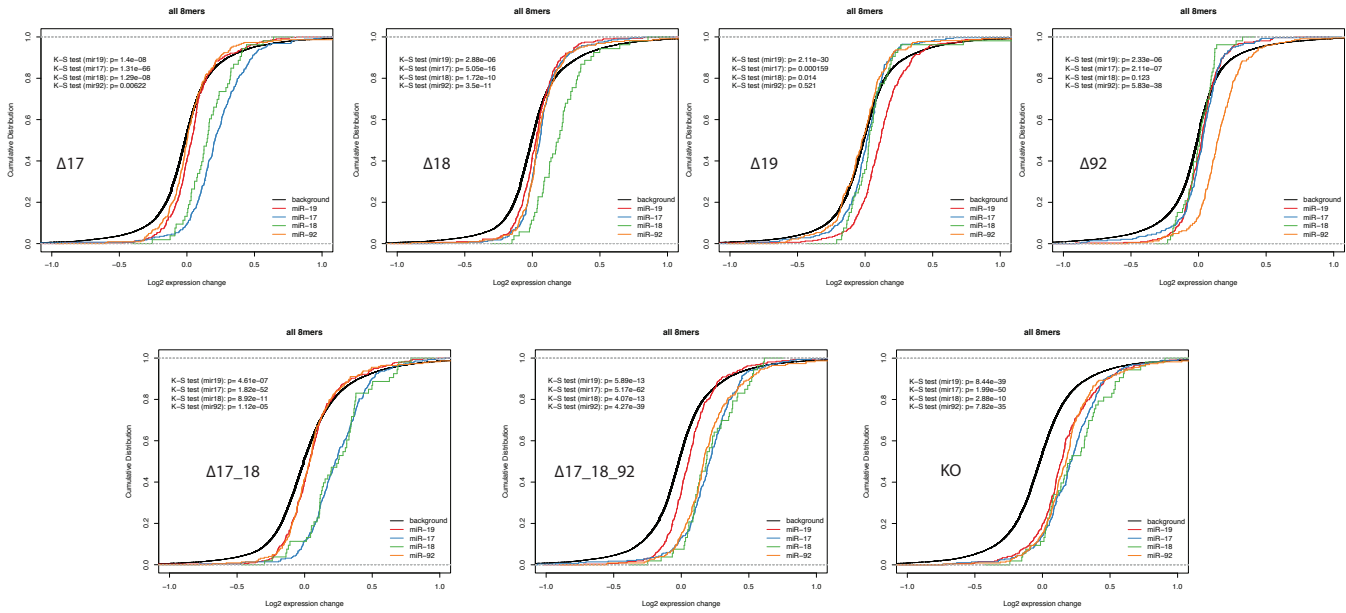

Supplementary Figure 7

**CDF plots of gene expression profiles from the miR-17~92 allelic series.**

Cumulative Distribution Fraction plots of  $\log_2$ -fold changes of genes without (black) or with (colored) 8-mers matches for members of the *miR-17~92* cluster in their 3'UTR. The plots were generated from the tail bud differential expression dataset.

|                  | <b>WT<br/>(25%)</b>    | <b>HET<br/>(50%)</b>    | <b>KO<br/>(25%)</b>   | <b>Corrected<br/>p Value</b> |
|------------------|------------------------|-------------------------|-----------------------|------------------------------|
| <b>Δ17</b>       | 50/144<br><b>(35%)</b> | 84/144<br><b>(58%)</b>  | 10/144<br><b>(7%)</b> | 1.21x10 <sup>-6</sup>        |
| <b>Δ18</b>       | 30/94<br><b>(32%)</b>  | 51/94<br><b>(54%)</b>   | 13/94<br><b>(14%)</b> | 0.19                         |
| <b>Δ19</b>       | 62/222<br><b>(28%)</b> | 149/222<br><b>(67%)</b> | 11/222<br><b>(5%)</b> | 1.09x10 <sup>-10</sup>       |
| <b>Δ92</b>       | 21/84<br><b>(25%)</b>  | 43/84<br><b>(51%)</b>   | 20/84<br><b>(24%)</b> | 5.79                         |
| <b>Δ17,18</b>    | 37/97<br><b>(38%)</b>  | 57/97<br><b>(59%)</b>   | 3/97<br><b>(3%)</b>   | 9.02x10 <sup>-6</sup>        |
| <b>Δ17,18,92</b> | 27/67<br><b>(40%)</b>  | 40/67<br><b>(60%)</b>   | 0/67<br><b>(0%)</b>   | 3.20x10 <sup>-5</sup>        |
| <b>Δ17~92</b>    | 24/60<br><b>(40%)</b>  | 36/60<br><b>(60%)</b>   | 0/60<br><b>(0%)</b>   | 1.42x10 <sup>-4</sup>        |

Supplementary Table 1.

**Allelic frequencies in C57BL/6J background.**

p-value was calculate using the chi-square test and adjusted for multiple hypothesis testing. Genotypes were determined at postnatal day 10-12.



|                |     | vertebral fusion | carpal bone fusion | toe syndactyly <sup>a</sup> | cleft palate | ossification delay |
|----------------|-----|------------------|--------------------|-----------------------------|--------------|--------------------|
| miR-17~92      | WT  | 0%               | 0%                 | 0%                          | 0%           | 0%                 |
|                | HET | 72%              | 0%                 | 0%                          | 0%           | 0%                 |
|                | KO  | 100%             | 100%               | 100%                        | 100%         | 100%               |
| Allelic series | WT  | 0%               | 0%                 | 0%                          | 0%           | 0%                 |
| Δ17            | HET | 17%              | 0%                 | 0%                          | 0%           | 0%                 |
|                | KO  | 43%              | 25%                | 0%                          | 0%           | 100%               |
| Δ18            | HET | 0%               | 0%                 | 0%                          | 0%           | 0%                 |
|                | KO  | 0%               | 0%                 | 0%                          | 0%           | 0%                 |
| Δ19            | HET | 0%               | 0%                 | 0%                          | 0%           | 0%                 |
|                | KO  | 20%              | 0%                 | 0%                          | 0%           | 0%                 |
| Δ92            | HET | 0%               | 0%                 | 0%                          | 0%           | 0%                 |
|                | KO  | 0%               | 0%                 | 0%                          | 0%           | 0%                 |
| Δ17,18         | HET | 0%               | 0%                 | 0%                          | 0%           | 0%                 |
|                | KO  | 57%              | 21%                | 0%                          | 0%           | 100%               |
| Δ17,18,92      | HET | 0%               | 0%                 | 0%                          | 0%           | 0%                 |
|                | KO  | 100%             | 100%               | 0%                          | 100%         | 100%               |

Supplementary Table 2

**Summary of skeletal malformations in miR-17~92 mutant mice.**

(a) Between 4<sup>th</sup> and 5<sup>th</sup> digits; n>5 mice

*miR-17~92*

| <b>Vertebral transformation</b> | <b>wt</b> |             | <b>het</b> |              | <b>ko</b> |               |
|---------------------------------|-----------|-------------|------------|--------------|-----------|---------------|
| <b>V14 (T7 to T8)</b>           | 0/18      | <b>(0%)</b> | 0/26       | <b>(0%)</b>  | 10/10     | <b>(100%)</b> |
| <b>V20 (T13 to L1a)</b>         | 0/18      | <b>(0%)</b> | 0/26       | <b>(0%)</b>  | 10/10     | <b>(100%)</b> |
| <b>V26 (L6 to S1)</b>           | 1/18      | <b>(6%)</b> | 12/26      | <b>(46%)</b> | 10/10     | <b>(100%)</b> |

Supplementary Table 3

**Homeotic transformations in *miR-17~92*<sup>A</sup> animals.**

T13 to L1a indicates the transformation of the 13<sup>th</sup> thoracic vertebra to a vertebra with rudimental or no ribs; T, thoracic vertebrae; L, lumbar vertebrae; S, sacral vertebrae.

*miR-17~92 Allelic Series*

| <b>Vertebral transformation</b> | <b>all wt</b> | <b>Δ17</b> | <b>Δ18</b> | <b>Δ19</b> | <b>Δ92</b> | <b>Δ17,18</b> | <b>Δ17,18,92</b> |
|---------------------------------|---------------|------------|------------|------------|------------|---------------|------------------|
| <b>V14 (T7 to T8)</b>           | 0/97 (0%)     | 5/9 (56%)  | 0/9 (0%)   | 0/9 (0%)   | 0/9 (0%)   | 7/7 (100%)    | 4/4 (100%)       |
| <b>V20 (T13 to L1a)</b>         | 0/97 (0%)     | 7/9 (78%)  | 0/9 (0%)   | 0/9 (0%)   | 0/9 (0%)   | 7/7 (100%)    | 4/4 (100%)       |
| <b>V26 (L6 to S1)</b>           | 10/97 (10%)   | 9/9 (100%) | 0/9 (0%)   | 0/9 (0%)   | 1/9 (11%)  | 7/7 (100%)    | 4/4 (100%)       |

Supplementary Table 4

**Homeotic transformations in mice from the miR-17~92 allelic series.**

T13 to L1a indicates the transformation of the 13<sup>th</sup> thoracic vertebra to a vertebra with rudimental or no ribs; T, thoracic vertebrae; L, lumbar vertebrae; S, sacral vertebrae.

## Supplementary Note

### **Reduction of miR-18 expression in miR-17~92 $\Delta_{17/\Delta 17}$ mice.**

RT-qPCR and small RNA-seq experiments to wild type and homozygous mutant mice from the *miR-17~92* allelic series revealed that deletion of the components of the miR-17 family is accompanied by a concomitant reduction of the expression of miR-18a (Fig. 1d and Supplementary Fig. 1). However, our analysis of the RNA-seq data described in Fig. 6 and Supplementary Fig. 6 suggests that this reduction has very limited, if any, functional consequences. In particular, we found that in *miR-17~92 $\Delta_{17,18/\Delta 17,18}$*  embryos many more genes are de-regulated compared to *miR-17~92 $\Delta_{17/\Delta 17}$*  mice. This shows that the expression of miR-18a in *miR-17~92 $\Delta_{17/\Delta 17}$*  mice, albeit lower than in wild-type animals, is sufficient to repress miR-18a targets. This, combined with the interesting observation that even complete miR-18a ablation (as in *miR-17~92 $\Delta_{18/\Delta 18}$*  mice) leads to de-regulation of only a handful of genes, suggests that miR-18a plays a largely ancillary role to miR-17.
